# Supplementary material for: Molecular and epigenetic features of melanomas and tumor immune microenvironment linked to durable remission to ipilimumab-based immunotherapy in metastatic patients
Source: PubMed Central journal article supplement (PMC4971660; doi:10.1186/s12967-016-0990-x), 2016-08-02
Supplement: 12967_2016_990_MOESM1_ESM.pdf [file 12967_2016_990_MOESM1_ESM.pdf]

**A BIOLOGICAL PROCESSES (first 20 out of 113 with FDR < 0.05)**

| Description                                         | FDR q-value |
|-----------------------------------------------------|-------------|
| immune system process                               | 6.97e-8     |
| immune response                                     | 1.31e-7     |
| signal transduction                                 | 3.29e-5     |
| regulation of immune system process                 | 6.34e-5     |
| humoral immune response                             | 5.68e-5     |
| chemokine-mediated signaling pathway                | 9.52e-5     |
| positive regulation of cell adhesion                | 1.29e-4     |
| regulation of cell adhesion                         | 1.19e-4     |
| cytokine-mediated signaling pathway                 | 2.47e-4     |
| defense response                                    | 3.69e-4     |
| adaptive immune response                            | 3.7e-4      |
| regulation of cell migration                        | 9.2e-4      |
| inflammatory response                               | 1.72e-3     |
| regulation of cell motility                         | 1.62e-3     |
| regulation of cellular component movement           | 1.6e-3      |
| biological adhesion                                 | 1.52e-3     |
| cell surface receptor signaling pathway             | 1.92e-3     |
| cell adhesion                                       | 1.86e-3     |
| lymphocyte activation                               | 1.85e-3     |
| positive regulation of leukocyte cell-cell adhesion | 1.97e-3     |

**B CELLULAR COMPONENT (14 results with FDR < 0.05)**

| Description                            | FDR q-value |
|----------------------------------------|-------------|
| intrinsic component of plasma membrane | 2.57E-5     |
| external side of plasma membrane       | 7.12E-5     |
| integral component of plasma membrane  | 4.92E-5     |
| plasma membrane part                   | 1.23E-4     |
| extracellular space                    | 4.74E-4     |
| side of membrane                       | 7.04E-4     |
| immunoglobulin complex                 | 3.04E-3     |
| blood microparticle                    | 3.46E-3     |
| extracellular region                   | 3.62E-3     |
| plasma membrane receptor complex       | 5.2E-3      |
| intrinsic component of membrane        | 1.34E-2     |
| plasma membrane                        | 1.73E-2     |
| immunoglobulin complex, circulating    | 1.68E-2     |
| integral component of membrane         | 2.47E-2     |

**C MOLECULAR FUNCTION (10 results with FDR < 0.05)**

| Description                               | FDR q-value |
|-------------------------------------------|-------------|
| molecular transducer activity             | 5.97E-5     |
| transmembrane signaling receptor activity | 3.67E-5     |
| receptor activity                         | 4.32E-5     |
| signal transducer activity                | 9.97E-5     |
| signaling receptor activity               | 9.1E-5      |
| antigen binding                           | 2.00E-4     |
| G-protein coupled receptor activity       | 7.19E-4     |
| C-X-C chemokine receptor activity         | 3.46E-2     |
| cytokine receptor activity                | 3.65E-2     |
| glycosaminoglycan binding                 | 4.79E-2     |
