# Supplementary material for: Molecular and epigenetic features of melanomas and tumor immune microenvironment linked to durable remission to ipilimumab-based immunotherapy in metastatic patients
Source: PubMed Central journal article supplement (PMC4971660; doi:10.1186/s12967-016-0990-x), 2016-08-02
Supplement: 12967_2016_990_MOESM2_ESM.pdf [file 12967_2016_990_MOESM2_ESM.pdf]

**A BIOLOGICAL PROCESSES (234 results with FDR < 0.001)**

| Description                                                      | FDR q-value |
|------------------------------------------------------------------|-------------|
| developmental process                                            | 5.00e-25    |
| single-organism developmental process                            | 3.60e-24    |
| movement of cell or subcellular component                        | 1.40e-18    |
| anatomical structure development                                 | 1.35e-17    |
| single-organism cellular process                                 | 4.47e-17    |
| neuron projection guidance                                       | 1.47e-16    |
| axon guidance                                                    | 1.26e-16    |
| cellular developmental process                                   | 2.13e-14    |
| regulation of nervous system development                         | 3.22e-14    |
| anatomical structure morphogenesis                               | 6.88e-14    |
| regulation of developmental process                              | 1.07e-13    |
| positive regulation of biological process                        | 1.51e-13    |
| single-organism process                                          | 1.04e-12    |
| regulation of cell differentiation                               | 1.41e-11    |
| enzyme linked receptor protein signaling pathway                 | 1.89e-11    |
| regulation of signaling                                          | 2.45e-11    |
| regulation of neurogenesis                                       | 2.68e-11    |
| regulation of cell development                                   | 2.74e-11    |
| localization                                                     | 3.74e-11    |
| cell surface receptor signaling pathway                          | 4.00e-11    |
| cellular process                                                 | 4.89e-11    |
| positive regulation of cellular process                          | 9.78e-11    |
| regulation of cell communication                                 | 9.82e-11    |
| regulation of neuron differentiation                             | 1.07e-10    |
| regulation of localization                                       | 2.44e-13    |
| single-organism localization                                     | 2.49e-13    |
| transmembrane receptor protein tyrosine kinase signaling pathway | 2.67e-13    |
| biological regulation                                            | 6.02e-13    |
| regulation of cellular process                                   | 6.17e-13    |
| anatomical structure formation involved in morphogenesis         | 6.26e-13    |
| positive regulation of developmental process                     | 7.52e-13    |
| regulation of multicellular organismal development               | 8.84e-13    |
| regulation of signal transduction                                | 1.01e-12    |
| regulation of multicellular organismal process                   | 1.10e-12    |
| cellular component organization                                  | 1.87e-12    |
| phosphorylation                                                  | 2.35e-12    |
| cell adhesion                                                    | 2.48e-12    |
| regulation of biological process                                 | 3.07e-12    |
| inorganic ion transmembrane transport                            | 3.63e-12    |
| regulation of response to stimulus                               | 3.64e-12    |
| cellular component organization or biogenesis                    | 3.78e-12    |
| regulation of neuron projection development                      | 4.92e-12    |
| inorganic cation transmembrane transport                         | 4.99e-12    |
| biological adhesion                                              | 4.99e-12    |
| organ morphogenesis                                              | 6.02e-12    |
| cytoskeleton organization                                        | 6.84e-12    |
| synaptic transmission                                            | 9.05e-12    |
| regulation of cellular component organization                    | 1.10e-11    |
| single-multicellular organism process                            | 1.82e-11    |
| cation transmembrane transport                                   | 1.97e-11    |

**B CELLULAR COMPONENT (51 results with FDR < 0.001)**

| Description                       | FDR q-value |
|-----------------------------------|-------------|
| neuron part                       | 1.75E-18    |
| cell junction                     | 1.75E-18    |
| cell projection                   | 8.49E-18    |
| synapse part                      | 3.83E-16    |
| cell projection part              | 5.03E-13    |
| synaptic membrane                 | 5.3E-12     |
| plasma membrane part              | 1.18E-11    |
| neuron projection                 | 3.05E-11    |
| plasma membrane region            | 1.37E-10    |
| membrane region                   | 3.38E-10    |
| postsynaptic membrane             | 4.42E-10    |
| plasma membrane protein complex   | 1.28E-9     |
| plasma membrane                   | 1.49E-9     |
| postsynaptic density              | 3.53E-9     |
| dendrite                          | 1.19E-8     |
| cell body                         | 1.19E-8     |
| adherens junction                 | 1.63E-8     |
| ion channel complex               | 1.99E-8     |
| anchoring junction                | 1.98E-8     |
| synapse                           | 3.02E-8     |
| axon part                         | 5.17E-8     |
| transmembrane transporter complex | 9.15E-8     |
| neuronal cell body                | 9.95E-8     |
| cytoskeleton                      | 1.18E-7     |
| membrane                          | 1.3E-7      |
